# Supplementary material for: Solvent- and Catalyst-free Synthesis, Hybridization and Characterization of Biobased Nonisocyanate Polyurethane (NIPU)
Source: PubMed Central journal article supplement (PMC6631551; doi:10.3390/polym11061026), 2019-06-10
Supplement: polymers-11-01026-s001.pdf [file polymers-11-01026-s001.pdf]

## Supplementary Material

### **Solvent- and catalyst-free synthesis, hybridization and characterization of biobased nonisocyanate polyurethane (NIPU)**

**Xin He, Xiaoling Xu, Qian Wan, Guangxu Bo and Yunjun Yan \***

Key Laboratory of Molecular Biophysics of the Ministry of Education, College of Life Science and Technology, Huazhong University of Science and Technology, Wuhan 430074, China

Experimental section

**Figure S1:** FTMS spectrum of BHA-2

**Figure S2:** FTMS spectrum of BHA-23

**Figure S3:** FTMS spectrum of BHA-34

**Figure S4:** FTMS spectrum of BHA-45

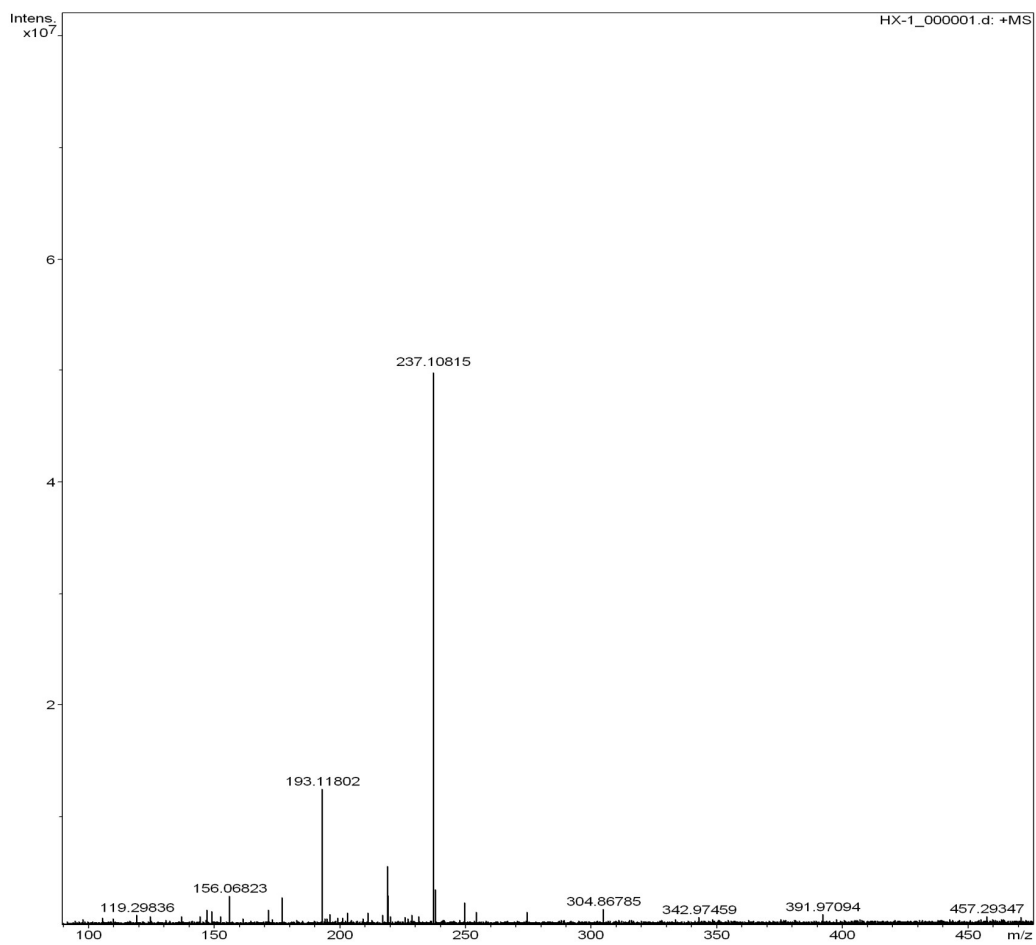

**Figure 1S.** FTMS spectrum of BHA-2

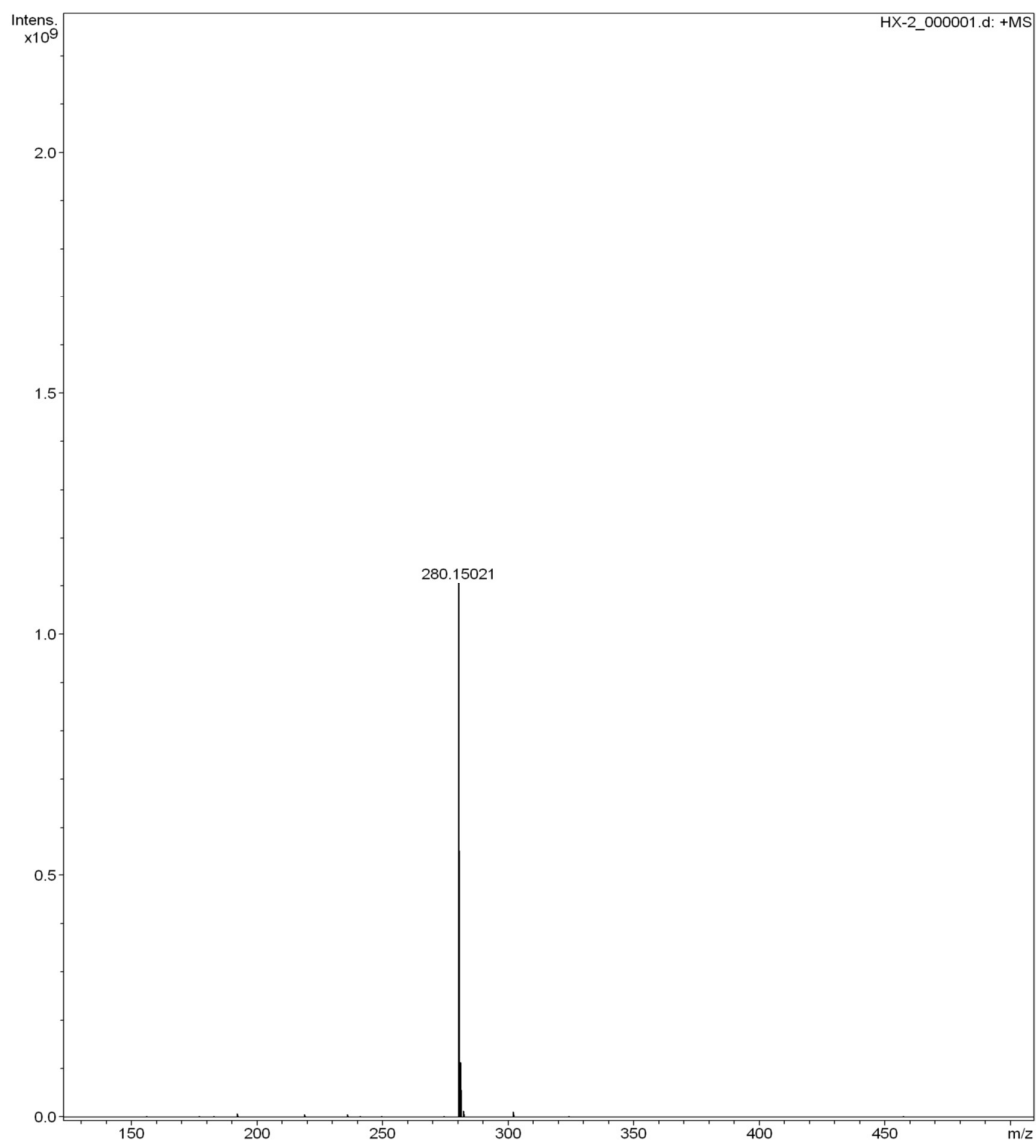

**Figure S2:** FTMS spectrum of BHA-23

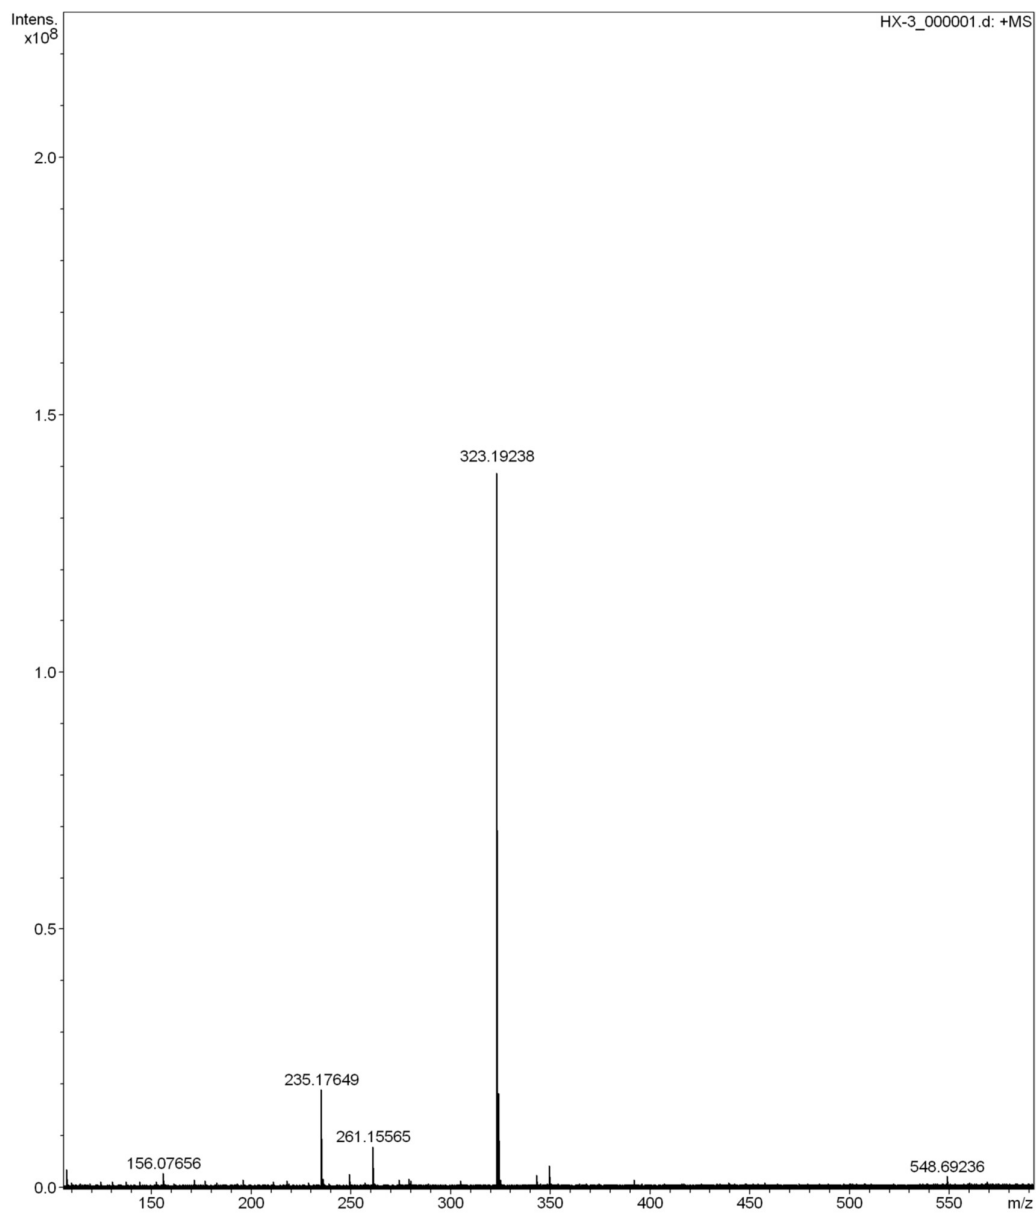

**Figure S3:** FTMS spectrum of BHA-34

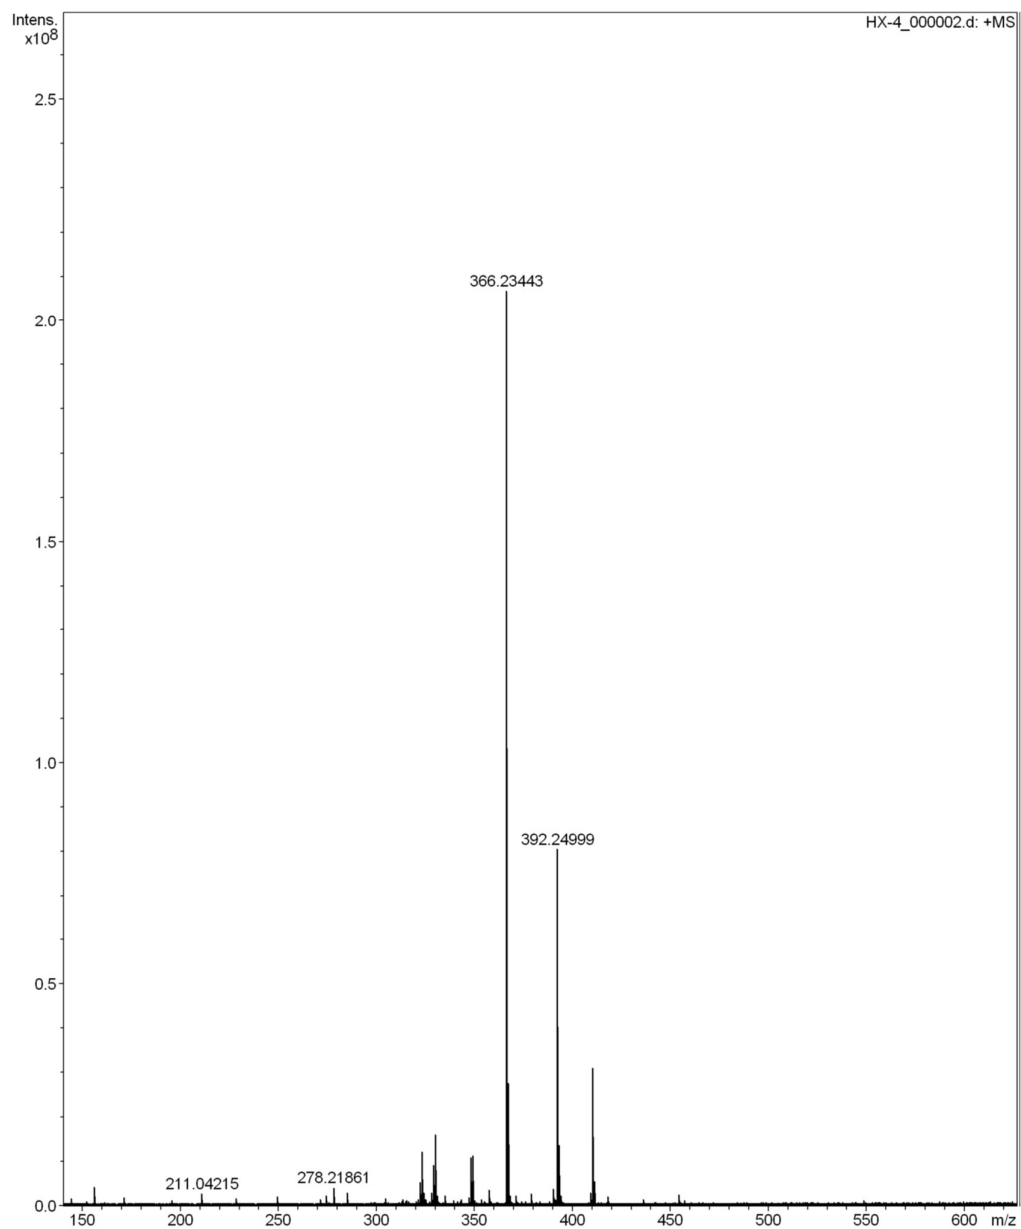

**Figure S4:** FTMS spectrum of BHA-45
